# Supplementary material for: Genomic Characterization of Listeria monocytogenes Isolates Associated with Clinical Listeriosis and the Food Production Environment in Ireland
Source: MDPI journal article supplement (doi:10.3390/genes9030171), 2018-03-20
Supplement: s1 [file s1]

# Supplementary Materials for Genomic Characterization of *Listeria monocytogenes* Isolates Associated with Clinical Listeriosis and the Food Production Environment in Ireland

Amber Hilliard, Dara Leong, Amy O'Callaghan, Eamonn P. Culligan, Ciara A. Morgan, Niall DeLappe, Colin Hill, Kieran Jordan, Martin Cormican and Cormac G.M. Gahan

**Supplementary Table S1** Number of single nucleotide polymorphisms identified when serotype 4b strains were compared, using F2365 as a reference genome.

| Isolate  | L2113 | L2259 | L970 | 130026 | 130029 | 130032 | 130033 | 130042 | 130058 | 140025 | 140030 | 140031 | 140033 | 150004 | 150005 | 150012 | 150013 | F2365 * |
|----------|-------|-------|------|--------|--------|--------|--------|--------|--------|--------|--------|--------|--------|--------|--------|--------|--------|---------|
| L2113    | 0     | 5434  | 56   | 50     | 56     | 43     | 5428   | 175    | 5406   | 247    | 5392   | 57     | 58     | 5429   | 5417   | 5405   | 5091   | 162     |
| L2259    | 5434  | 0     | 5440 | 5434   | 5442   | 5431   | 101    | 5437   | 5780   | 5505   | 5312   | 5441   | 5442   | 60     | 5795   | 5783   | 5509   | 5418    |
| L970     | 56    | 5440  | 0    | 56     | 62     | 51     | 5434   | 185    | 5412   | 251    | 5398   | 61     | 62     | 5435   | 5423   | 5413   | 5097   | 170     |
| MQ130026 | 50    | 5434  | 56   | 0      | 46     | 41     | 5428   | 177    | 5406   | 244    | 5392   | 53     | 48     | 5429   | 5417   | 5405   | 5091   | 162     |
| MQ132009 | 56    | 5442  | 62   | 46     | 0      | 47     | 5436   | 185    | 5414   | 253    | 5400   | 59     | 54     | 5437   | 5425   | 5415   | 5099   | 170     |
| MQ130032 | 43    | 5431  | 51   | 41     | 47     | 0      | 5425   | 172    | 5403   | 242    | 5389   | 48     | 49     | 5426   | 5414   | 5404   | 5088   | 159     |
| MQ130033 | 5428  | 101   | 5434 | 5428   | 5436   | 5425   | 0      | 5431   | 5771   | 5499   | 5305   | 5435   | 5436   | 95     | 5786   | 5774   | 5501   | 5412    |
| MQ130042 | 175   | 5437  | 185  | 177    | 185    | 172    | 5431   | 0      | 5409   | 250    | 5395   | 186    | 187    | 5432   | 5420   | 5410   | 5092   | 137     |
| MQ130058 | 5406  | 5780  | 5412 | 5406   | 5414   | 5403   | 5771   | 5409   | 0      | 5477   | 5849   | 5413   | 5414   | 5773   | 91     | 77     | 5587   | 5388    |
| MQ140025 | 247   | 5505  | 251  | 244    | 253    | 242    | 5499   | 250    | 5477   | 0      | 5463   | 252    | 253    | 5500   | 5488   | 5478   | 5162   | 233     |
| MQ140030 | 5392  | 5312  | 5398 | 5392   | 5400   | 5389   | 5305   | 5395   | 5849   | 5463   | 0      | 5399   | 5400   | 5306   | 5862   | 5850   | 5665   | 5372    |
| MQ140031 | 57    | 5441  | 61   | 53     | 59     | 48     | 5435   | 186    | 5413   | 252    | 5399   | 0      | 59     | 5436   | 5424   | 5414   | 5098   | 171     |
| MQ140033 | 58    | 5442  | 62   | 48     | 54     | 49     | 5436   | 187    | 5414   | 253    | 5400   | 59     | 0      | 5437   | 5425   | 5415   | 5099   | 172     |
| MQ150004 | 5429  | 60    | 5435 | 5429   | 5437   | 5426   | 95     | 5432   | 5773   | 5500   | 5306   | 5436   | 5437   | 0      | 5788   | 5776   | 5502   | 5413    |
| MQ150005 | 5417  | 5795  | 5423 | 5417   | 5425   | 5414   | 5786   | 5420   | 91     | 5488   | 5862   | 5424   | 5425   | 5788   | 0      | 100    | 5605   | 5397    |
| MQ150012 | 5405  | 5783  | 5413 | 5405   | 5415   | 5404   | 5774   | 5410   | 77     | 5478   | 5850   | 5414   | 5415   | 5776   | 100    | 0      | 5590   | 5389    |
| MQ150013 | 5091  | 5509  | 5097 | 5091   | 5099   | 5088   | 5501   | 5092   | 5587   | 5162   | 5665   | 5098   | 5099   | 5502   | 5605   | 5590   | 0      | 5069    |
| F2365 *  | 162   | 5418  | 170  | 162    | 170    | 159    | 5412   | 137    | 5388   | 233    | 5372   | 171    | 172    | 5413   | 5397   | 5389   | 5069   | 0       |

min: 41 max: 5862

\* Reference strain

**Supplementary Table S2.** Number of single nucleotide polymorphisms identified when serotype 1/2a strains were compared, using EGDe as a reference genome.

| Isolate           | L1445 | L1976 | L2256 | 130037 | 140011 | 140012 | 140029 | 140032 | 140034 | 140035 | 150001 | 150007 | 150008 | 150011 | EGDe * |
|-------------------|-------|-------|-------|--------|--------|--------|--------|--------|--------|--------|--------|--------|--------|--------|--------|
| L1445             | 0     | 10146 | 12511 | 10287  | 11637  | 11636  | 6      | 11825  | 12482  | 12479  | 10236  | 11631  | 11641  | 10094  | 9522   |
| L1976             | 10146 | 0     | 12230 | 9814   | 11569  | 11568  | 10150  | 11656  | 12197  | 12194  | 9312   | 11565  | 11571  | 9701   | 8263   |
| L2256             | 12511 | 12230 | 0     | 12182  | 11203  | 11202  | 12515  | 11068  | 173    | 170    | 12273  | 11193  | 11203  | 12259  | 11363  |
| MQ130037          | 10287 | 9814  | 12182 | 0      | 11557  | 11556  | 10291  | 11560  | 12145  | 12142  | 9623   | 11549  | 11555  | 9618   | 7926   |
| MQ140011          | 11637 | 11569 | 11203 | 11557  | 0      | 3      | 11641  | 4534   | 11168  | 11165  | 11656  | 97     | 85     | 11589  | 10668  |
| MQ140012          | 11636 | 11568 | 11202 | 11556  | 3      | 0      | 11640  | 4533   | 11167  | 11164  | 11655  | 96     | 84     | 11588  | 10667  |
| MQ140029          | 6     | 10150 | 12515 | 10291  | 11641  | 11640  | 0      | 11829  | 12486  | 12483  | 10240  | 11635  | 11645  | 10096  | 9526   |
| MQ140032          | 11825 | 11656 | 11068 | 11560  | 4534   | 4533   | 11829  | 0      | 11037  | 11034  | 11617  | 4530   | 4534   | 11720  | 10683  |
| MQ140034          | 12482 | 12197 | 173   | 12145  | 11168  | 11167  | 12486  | 11037  | 0      | 3      | 12244  | 11164  | 11168  | 12226  | 11330  |
| MQ140035          | 12479 | 12194 | 170   | 12142  | 11165  | 11164  | 12483  | 11034  | 3      | 0      | 12241  | 11161  | 11165  | 12223  | 11327  |
| MQ150001          | 10236 | 9312  | 12273 | 9623   | 11656  | 11655  | 10240  | 11617  | 12244  | 12241  | 0      | 11648  | 11658  | 9545   | 8589   |
| MQ150007          | 11631 | 11565 | 11193 | 11549  | 97     | 96     | 11635  | 4530   | 11164  | 11161  | 11648  | 0      | 12     | 11581  | 10663  |
| MQ150008          | 11641 | 11571 | 11203 | 11555  | 85     | 84     | 11645  | 4534   | 11168  | 11165  | 11658  | 12     | 0      | 11591  | 10673  |
| MQ150011          | 10094 | 9701  | 12259 | 9618   | 11589  | 11588  | 10096  | 11720  | 12226  | 12223  | 9545   | 11581  | 11591  | 0      | 8980   |
| EGDe *            | 9522  | 8263  | 11363 | 7926   | 10668  | 10667  | 9526   | 10683  | 11330  | 11327  | 8589   | 10663  | 10673  | 8980   | 0      |
| min: 3 max: 12515 |       |       |       |        |        |        |        |        |        |        |        |        |        |        |        |

\* Reference strain
